# Supplementary material for: Headwater sediment dynamics in debris flow catchment: implication of debris supply using high resolution topographic surveys
Source: Copernicus journal article supplement (doi:10.5194/esurf-2015-48), 2016-01-14
Supplement: Supplementary file 1 [file esurf-2015-48-supplement.pdf]

1141 Sediment budgets for all catchment subsystems revealed by comparing the successive TLS surveys operated over 16 months of  
1142 monitoring. Each survey period are expressed separately in volume unit [m<sup>3</sup>] with uncertainty.

|                                         |              |      |         |      |        |              |              |          |       |         |        |          |        |         |         |          |        |         |               |          |       |          |                       |       |  |
|-----------------------------------------|--------------|------|---------|------|--------|--------------|--------------|----------|-------|---------|--------|----------|--------|---------|---------|----------|--------|---------|---------------|----------|-------|----------|-----------------------|-------|--|
| 1 <sup>st</sup><br>monitoring<br>period | Col du Baure |      |         |      |        |              | Roche Ravine |          |       |         |        |          |        |         | Manival |          |        |         | Grosse Pierre |          |       |          | Genievre <sup>1</sup> |       |  |
|                                         | Gully Series |      |         |      |        | Baure Ravine |              | Lower    |       |         |        | Upper    |        |         |         |          |        |         |               |          |       |          |                       |       |  |
|                                         | Hillside     |      | Channel |      |        | Hillside     |              | Hillside |       | Channel |        | Hillside |        | Channel |         | Hillside |        | Channel |               | Hillside |       | Hillside |                       |       |  |
|                                         | Rockfall     | 1.9  | ±0.1    |      |        | 25.5         | ±2.2         | 3.4      | ±0.5  |         |        | 37.4     | ±0.6   |         |         | 24.9     | ±1.5   |         |               | 2.5      | ±0.5  | 3.8      | ±0.5                  |       |  |
| Deposition                              | 0.0          | ±0.0 | 79.7    | ±3.7 | 72.2   | ±2.4         | 10.0         | ±1.2     | 69.4  | ±7.2    | 0.0    | ±0.0     | 0.0    | ±0.0    | 11.1    | ±1.1     | 0.0    | ±0.0    | 309.2         | ±30.1    | 5.8   | ±0.7     |                       |       |  |
| Erosion                                 | 19.2         | ±0.7 | 60.2    | ±2.0 | 159.5  | ±12.4        | 14.2         | ±1.0     | 102.9 | ±6.8    | 14.5   | ±1.1     | 107.1  | ±11.7   | 22.3    | ±1.6     | 366.2  | ±22.8   | 302.3         | ±31.5    | 15.1  | ±1.3     |                       |       |  |
| Subtotal                                | -2.1         | ±0.7 | -10.0   | ±4.2 | -103.4 | ±12.8        | -7.7         | ±1.6     | -51.0 | ±9.9    | -51.9  | ±1.3     | -107.1 | ±11.7   | -36.1   | ±2.5     | -366.2 | ±22.8   | -13.1         | ±43.6    | 0.00  | ±0.00    | -13.1                 | ±1.5  |  |
| 2 <sup>nd</sup><br>monitoring<br>period | Col du Baure |      |         |      |        |              | Roche Ravine |          |       |         |        |          |        |         | Manival |          |        |         | Grosse Pierre |          |       |          | Genievre <sup>1</sup> |       |  |
|                                         | Gully Series |      |         |      |        | Baure Ravine |              | Lower    |       |         |        | Upper    |        |         |         |          |        |         |               |          |       |          |                       |       |  |
|                                         | Hillside     |      | Channel |      |        | Hillside     |              | Hillside |       | Channel |        | Hillside |        | Channel |         | Hillside |        | Channel |               | Hillside |       | Hillside |                       |       |  |
|                                         | Rockfall     | 1.2  | ±0.1    |      |        | 5.2          | ±0.9         | 1.4      | ±0.2  |         |        | 18.0     | ±0.7   |         |         | 23.5     | ±0.9   |         |               | 79.4     | ±5.8  | 1.2      | ±0.2                  |       |  |
| Deposition                              | 42.3         | ±1.5 | 15.1    | ±0.9 | 50.6   | ±3.1         | 4.1          | ±1.1     | 1.1   | ±0.4    | 0.2    | ±0.1     | 11.0   | ±0.5    | 5.2     | ±0.6     | 100.0  | ±6.4    | 76.1          | ±5.0     | 0.0   | ±0.0     |                       |       |  |
| Erosion                                 | 76.9         | ±2.7 | 39.4    | ±1.0 | 112.5  | ±6.8         | 95.0         | ±4.7     | 0.6   | ±0.3    | 9.0    | ±0.5     | 39.6   | ±2.2    | 270.0   | ±7.4     | 442.9  | ±15.8   | 76.1          | ±5.0     | 0.3   | ±0.1     |                       |       |  |
| Subtotal                                | -44.8        | ±3.1 | -15.6   | ±1.4 | -60.9  | ±7.5         | -92.3        | ±4.9     | 0.4   | ±0.5    | -26.8  | ±0.8     | -28.6  | ±2.3    | -278.3  | ±61.1    | -322.8 | ±17.1   | 3.4           | ±2.1     | 0.0   | ±0.0     | -1.5                  | ±0.2  |  |
| 3 <sup>rd</sup><br>monitoring<br>period | Col du Baure |      |         |      |        |              | Roche Ravine |          |       |         |        |          |        |         | Manival |          |        |         | Grosse Pierre |          |       |          | Genievre <sup>1</sup> |       |  |
|                                         | Gully Series |      |         |      |        | Baure Ravine |              | Lower    |       |         |        | Upper    |        |         |         |          |        |         |               |          |       |          |                       |       |  |
|                                         | Hillside     |      | Channel |      |        | Hillside     |              | Hillside |       | Channel |        | Hillside |        | Channel |         | Hillside |        | Channel |               | Hillside |       | Hillside |                       |       |  |
|                                         | Rockfall     | 17.7 | ±0.3    |      | ±0.0   | 825.5        | ±25.1        | 28.6     | ±1.2  |         |        | 256.6    | ±17.2  |         |         | 2034.8   | ±39.7  |         |               | 145.3    | ±2.5  | 116.3    | ±3.0                  |       |  |
| Deposition                              | 148.6        | ±1.5 | 3.3     | ±0.3 | 1671.1 | ±71.6        | 212.0        | ±30.0    | 0.0   | ±0.0    | 67.6   | ±4.75    | 147.9  | ±18.2   | 515.9   | ±9.4     | 948.1  | ±17.4   | 343.8         | ±16.9    | 204.5 | ±13.6    |                       |       |  |
| Erosion                                 | 58.5         | ±2.3 | 97.1    | ±3.5 | 453.3  | ±33.2        | 274.8        | ±5.8     | 21.6  | ±1.7    | 379.6  | ±16.3    | 44.0   | ±3.4    | 196.1   | ±4.8     | 486.5  | ±19.8   | 129.2         | ±4.7     | 1.7   | ±0.2     |                       |       |  |
| Subtotal                                | 72.4         | ±2.8 | -93.8   | ±3.5 | 392.3  | ±79.3        | -91.5        | ±30.6    | -21.6 | ±1.7    | -558.7 | ±9.57    | 104.0  | ±18.5   | -1715.0 | ±11.9    | 461.6  | ±26.4   | 69.3          | ±11.0    | 4.5   | ±0.5     | -361.8                | ±19.6 |  |

1143 <sup>1</sup> The downstream reaches of the Genièvre first-order channel was not monitored, as they displayed barely any in-channel debris storage.

1144

1145

1146
